# Supplementary material
Source: PubMed Central journal article supplement (PMC2765096)
Supplement: 0906352106_0906352106SI.pdf [file 0906352106_0906352106SI.pdf]

# Supporting Information

Marchal et al. 10.1073/pnas.0906352106

## SI Materials and Methods

**Expression Constructs.** Initial references for our expression constructs are as follows: *dnFGFR4* (1), *noggin* (2), *bmp4* (3), *smad5-sbn* (4), *zic1* (5), *zic3* (6), *FGF4* (7), and *LM-Smad1* (8).

**In Situ Hybridization and Probes and Immunostaining.** The following modifications were introduced to the protocol by Gawantka and colleagues (9): (i) methanol was replaced by ethanol; (ii) post-fixation following proteinase K treatment was omitted; (iii) hybridization and washes were performed at 60 °C; and (iv) incubation with the anti-digoxigenin antibody was done in MAB (100 mM maleic acid, 150 mM NaCl, pH 7.5) and washes were done in MAB supplemented with 0.1% Triton X-100. Antisense

riboprobes for *sox2* (5), *sox3* (10), *cerberus* (11), *fgf8* (12), *chordin* (13), *noggin* (2), *xbra* (14), *gooseoid* (15), *otx2* (16), *hoxA7* (17), *zic1* (18), *k81* (19), *zic3* (6), and *foxD5a* (20) were prepared as described in the respective references. The *FGF4* probe was prepared from a clone in pCS2+ (gift from Harv Isaacs, York, United Kingdom). The plasmid was linearized with HindIII and transcribed with T7. Anti-NCAM immunostaining was carried out with the 4d antibody as described (20).

**Quantitative RT-PCR.** The following primers were used as described in the original references: *fgf4* reported by Kofron et al. (22), *sox2* reported by Mir et al. (23), and ODC used as an internal reference as reported by Heasman et al. (24).

1. Hongo I, Kengaku M, Okamoto H (1999) FGF signaling and the anterior neural induction in *Xenopus*. *Dev Biol* 216:561–581.
2. Smith WC, Harland RM (1992) Expression cloning of noggin, a new dorsalizing factor localized to the Spemann organizer in *Xenopus* embryos. *Cell* 70:829–840.
3. Dale L, Howes G, Price BM, Smith C (1992) Bone morphogenetic protein 4: a ventralizing factor in early *Xenopus* development. *Development* 115:573–585.
4. Beck CW, Whitman M, Slack M (2001) The role of BMP signaling in outgrowth and patterning of the *Xenopus* tail bud. *Dev Biol* 238:303–314.
5. Mizuseki K, Kishi M, Matsui M, Nakanishi S, Sasai Y (1998) *Xenopus* Zic-related-1 and Sox-2, two factors induced by chordin, have distinct activities in the initiation of neural induction. *Development* 125:579–587.
6. Nakata K, Nagai T, Aruga J, Mikoshiba K (1997) *Xenopus* Zic3, a primary regulator both in neural and neural crest development. *Proc Natl Acad Sci USA* 94:11980–11985.
7. Fisher ME, Isaacs HV, Pownall E (2002) eFGF is required for activation of XmyoD expression in the myogenic cell lineage of *Xenopus laevis*. *Development* 129:1307–1315.
8. Pera EM, Ikeda A, Eivers E, De Robertis M (2003) Integration of IGF, FGF, and anti-BMP signals via Smad1 phosphorylation in neural induction. *Genes Dev* 17:3023–3028.
9. Gawantka V, Delius H, Hirschfeld K, Blumenstock C, Niehrs C (1995) Antagonizing the Spemann organizer: role of the homeobox gene Xvent-1. *EMBO J* 14:6268–6279.
10. Penzel R, Oschwald R, Chen Y, Tacke L, Grunz H (1997) Characterization and early embryonic expression of a neural specific transcription factor xSOX3 in *Xenopus laevis*. *Int J Dev Biol* 41:667–677.
11. Bouwmeester T, Kim S, Sasai Y, Lu B, De Robertis M (1996) Cerberus is a head-inducing secreted factor expressed in the anterior endoderm of Spemann's organizer. *Nature* 382:595–601.
12. Monsoro-Burq AH, Fletcher RB, Harland M (2003) Neural crest induction by paraxial mesoderm in *Xenopus* embryos requires FGF signals. *Development* 130:3111–3124.
13. Sasai Y, et al. (1994) *Xenopus* chordin: a novel dorsalizing factor activated by organizer-specific homeobox genes. *Cell* 79:779–790.
14. Smith JC, Price BM, Green JB, Weigel D, Herrmann G (1991) Expression of a *Xenopus* homolog of Brachyury (T) is an immediate-early response to mesoderm induction. *Cell* 67:79–87.
15. Yasuo H, Lemaire P (2001) Role of Gooseoid, Xnot and Wnt antagonists in the maintenance of the notochord genetic programme in *Xenopus* gastrulae. *Development* 128:3783–3793.
16. Pannese M, et al. (1995) The *Xenopus* homologue of Otx2 is a maternal homeobox gene that demarcates and specifies anterior body regions. *Development* 121:707–720.
17. Isaacs HV, Pownall ME, Slack M (1998) Regulation of Hox gene expression and posterior development by the *Xenopus* caudal homologue Xcad3. *EMBO J* 17:3413–3427.
18. Kuo JS, et al. (1998) Opl: a zinc finger protein that regulates neural determination and patterning in *Xenopus*. *Development* 125:2867–2882.
19. Jonas EA, Snape AM, Sargent D (1989) Transcriptional regulation of a *Xenopus* embryonic epidermal keratin gene. *Development* 106:399–405.
20. Sullivan SA, Akers L, Moody A (2001) *foxD5a*, a *Xenopus* winged helix gene, maintains an immature neural ectoderm via transcriptional repression that is dependent on the C-terminal domain. *Dev Biol* 232:439–457.
21. Carnac G, Kodjabachian L, Gurdon JB, Lemaire P (1996) The homeobox gene Siamois is a target of the Wnt dorsalisation pathway and triggers organiser activity in the absence of mesoderm. *Development* 122:3055–3065.
22. Kofron M, Wylie C, Heasman J (2004) The role of Mixer in patterning the early *Xenopus* embryo. *Development* 131:2431–2441.
23. Mir A, et al. (2007) Foxl1e activates ectoderm formation and controls cell position in the *Xenopus* blastula. *Development* 134:779–788.
24. Heasman J, Kofron M, Wylie C (2000) Beta-catenin signaling activity dissected in the early *Xenopus* embryo: a novel antisense approach. *Dev Biol* 222:124–134.

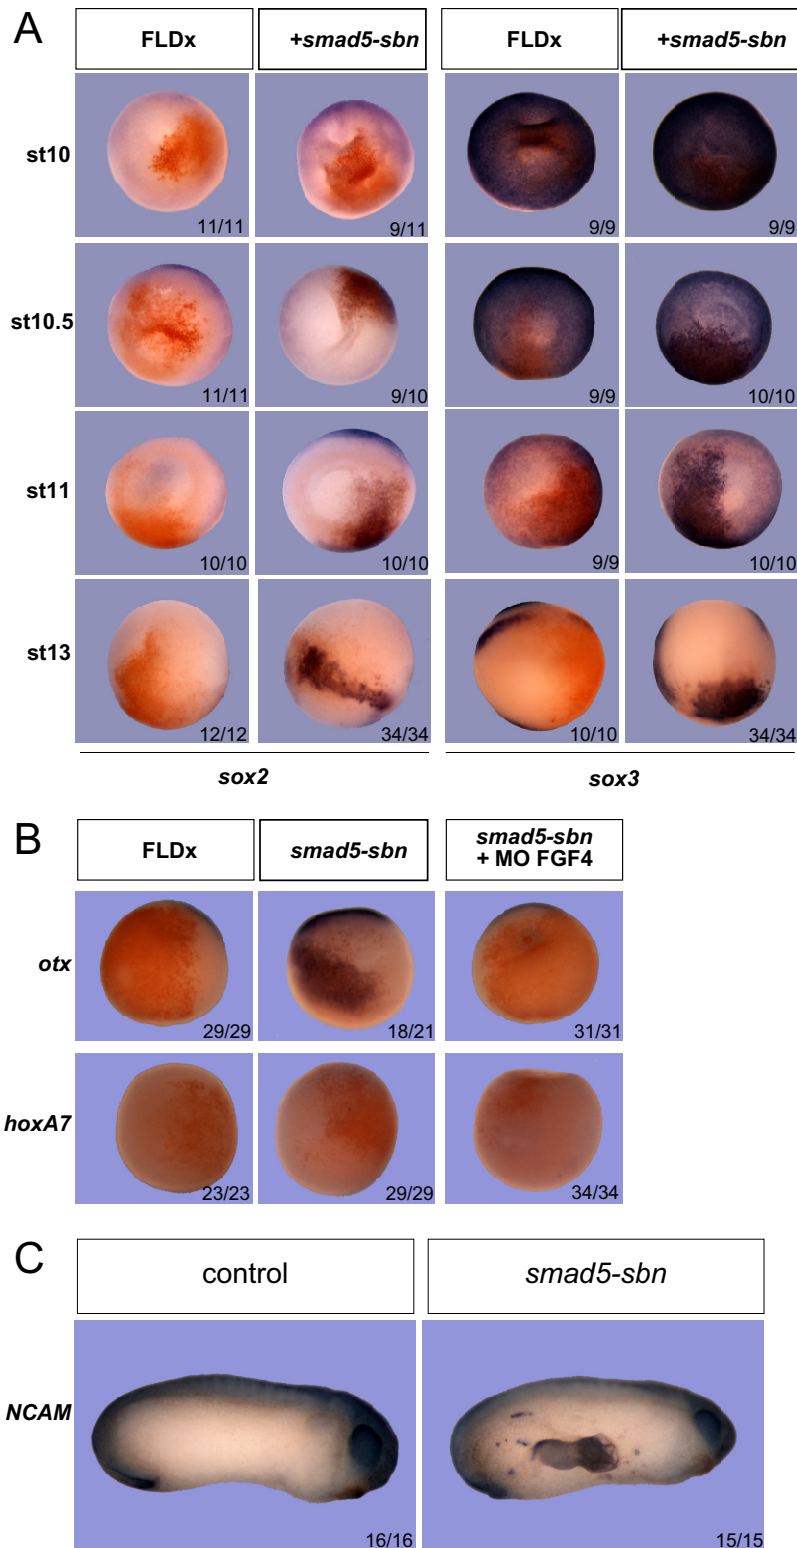

**Fig. S1.** In vivo induction of anterior neural tissue by *Smad5-sbn*. (A) Embryos were injected in one AB4 blastomere at 16-cell stage with 2.5 ng FLDx alone or with 3 ng *smad5-sbn* mRNA as indicated. Both *sox2* and *sox3* activation is detectable at stage 10.5. Note that the maternal message for *sox3* is uniformly distributed in the animal region and is cleared by stage 11. All embryos are viewed from the animal pole, dorsal to the top. (B) Ventral views of stage 13 embryos injected in AB4 at 16-cell stage with 2.5 ng FLDx alone or with 3 ng *smad5-sbn* mRNA, and 23 ng FGF4 MO, as indicated. *Otx2* but not *hoxA7* is activated by *Smad5-sbn*, in an FGF4-dependent manner. (C) Lateral views of tailbud stage embryos injected in one AB4 blastomere at 16-cell stage with 3 ng *smad5-sbn* mRNA. The control embryo was uninjected. The neural tissue induced by *Smad5-sbn* expressed the late neural marker *NCAM*.

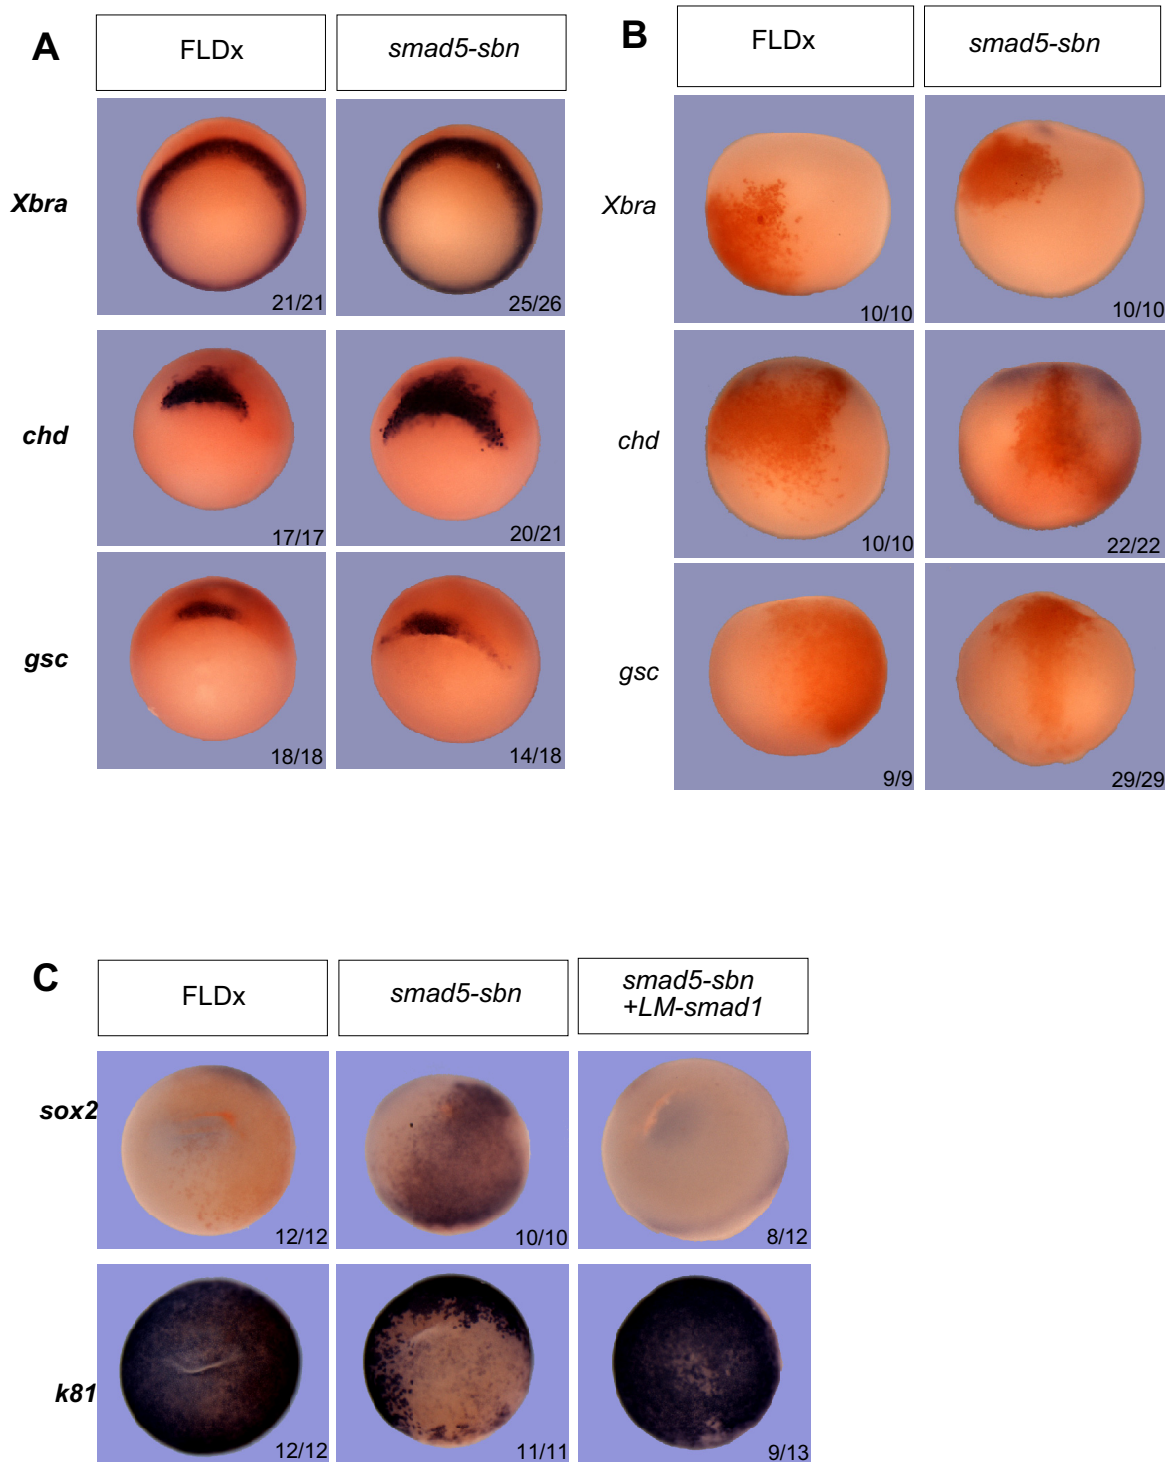

**Fig. S2.** Smad5-sbn inhibits BMP but not Activin/Nodal, or Wnt signaling. (A) Embryos were injected at the 4-cell stage in the 2 dorsal blastomeres with 2.5 ng/blastomere FLDx alone, or with 3 ng/blastomere *smad5-sbn* mRNA as indicated. The Activin/Nodal targets *Xbra*, *chd*, and *gsc* were not suppressed, ruling out an effect of Smad5-sbn on this pathway. The canonical Wnt targets *chd* and *gsc* were not suppressed, ruling out an effect of Smad5-sbn on this pathway. The organizer markers *chd* and *gsc* were expanded laterally, as expected from the reduction of BMP signaling. All embryos are viewed from the vegetal pole, dorsal to the top. (B) Sixteen-cell embryos were injected in one AB4 blastomere with 2.5 ng FLDx alone or with 3 ng *smad5-sbn* mRNA as indicated. None of the dorsal mesoderm markers were activated, ruling out indirect neural induction in response to Smad5-sbn. Embryos are viewed ventrally, anterior to the top. (C) Ventral views of stage 13 embryos injected at 16-cell stage in one AB4 blastomere with 2.5 ng FLDx alone or with 3 ng *smad5-sbn*, and 250 pg *LM-Smad1* mRNAs, as indicated. LM-Smad1 reverted the effect of Smad5-sbn, indicating that the latter repressed BMP/Smad1 activity.

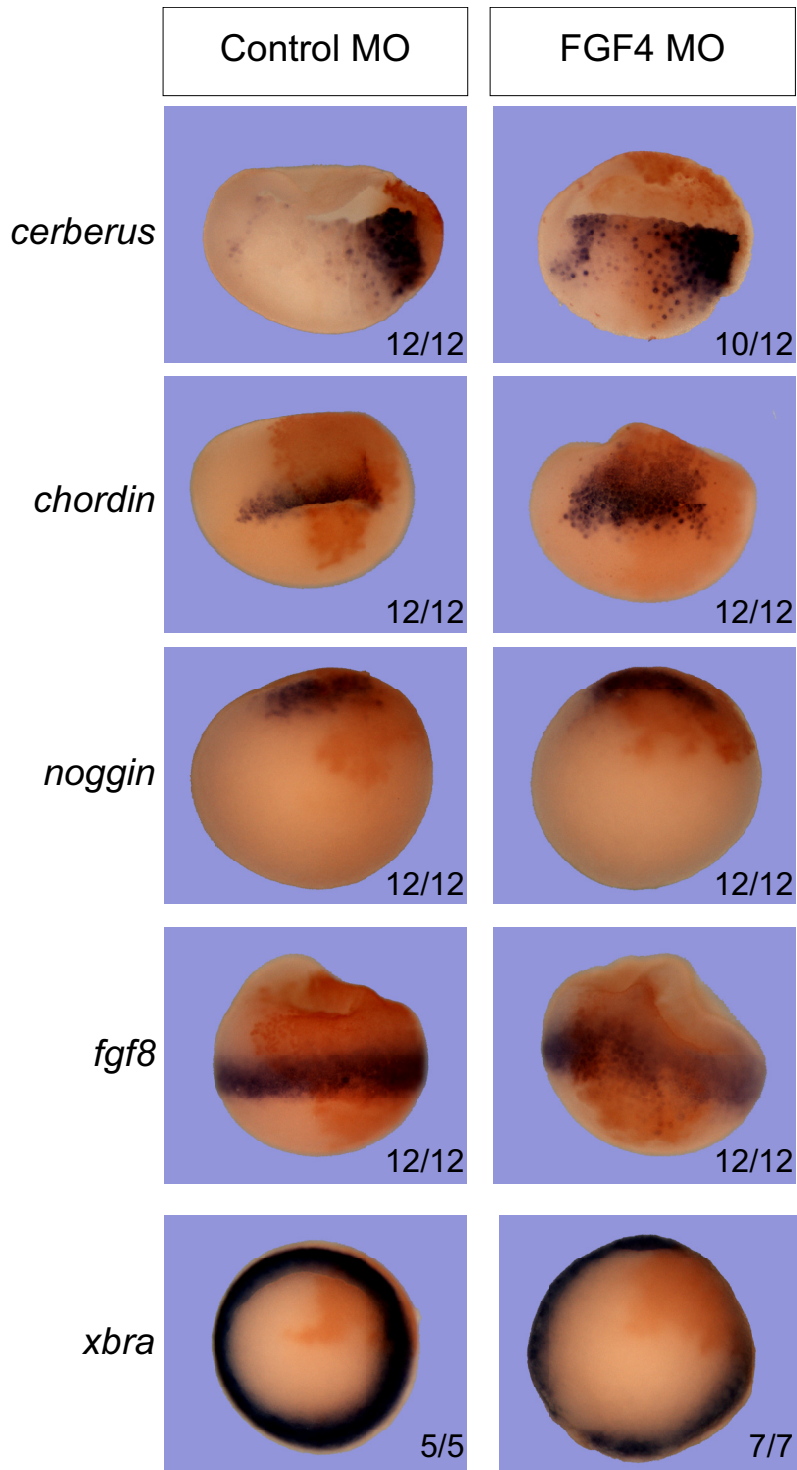

**Fig. S3.** FGF4 knockdown does not suppress expression of organizer-specific BMP antagonists. Four-cell embryos were injected marginally in one of the 2 dorsal cells with 2.5 ng FLDx and 23 ng control MO or 23 ng FGF4 MO as indicated. WISH analysis was performed at early gastrula stage 10. For *cerberus*, embryos were bisected before WISH. They are viewed dorsal to the right and animal to the top. For *chordin* and *FGF8*, embryos are viewed dorsally, animal to the top. For *noggin* and *Xbra*, embryos are viewed vegetally, dorsal to the top.

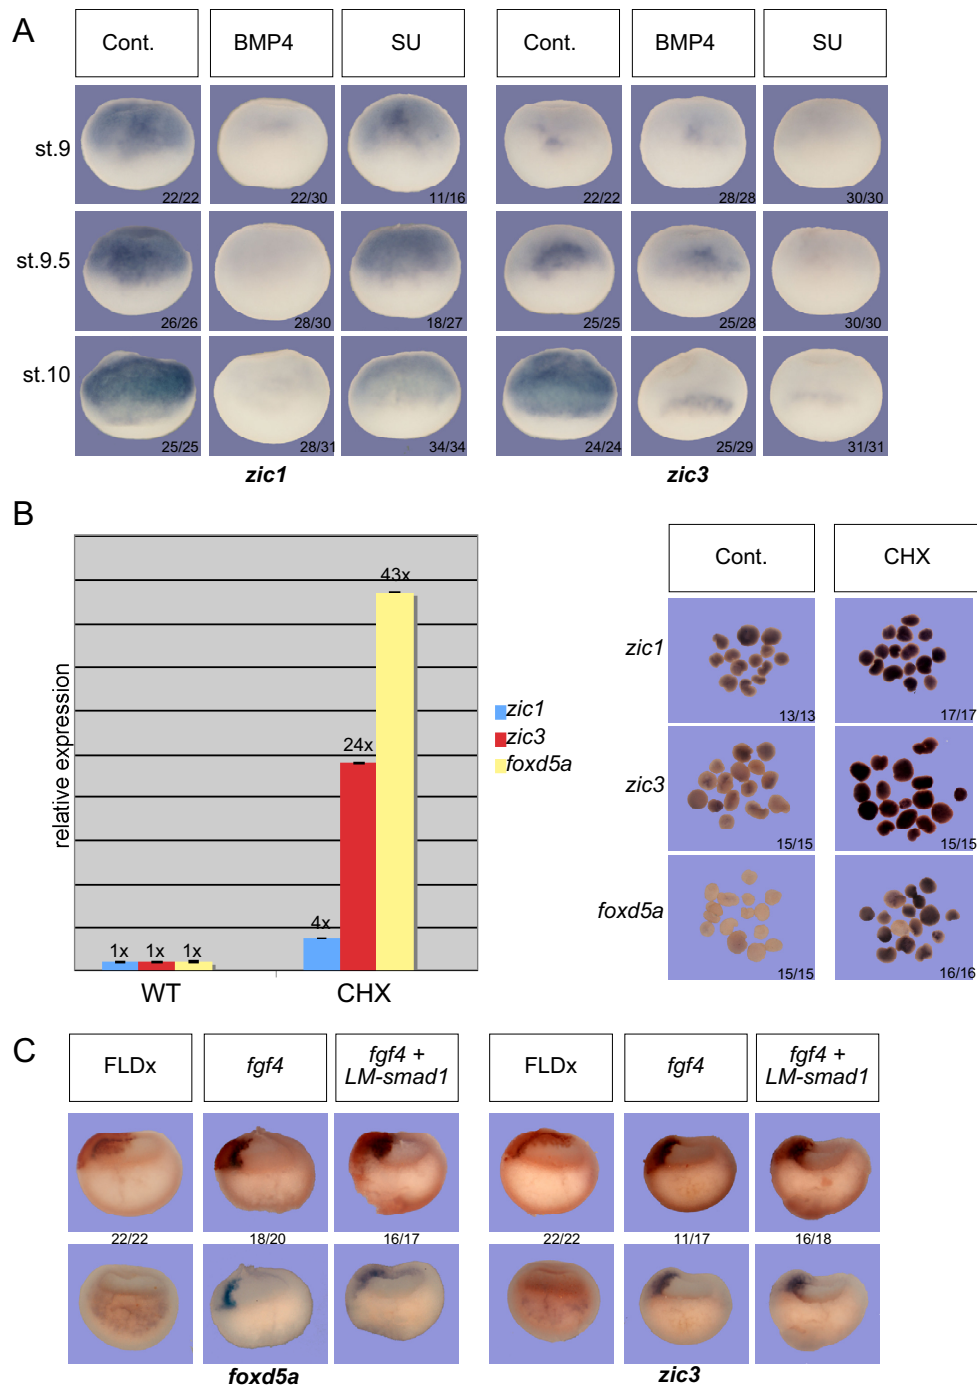

**Fig. S4.** Initiation of *zic1*, *zic3*, and *foxD5a* expression by BMP inhibition and FGF signaling. (A) Embryos were injected with 40 ng BSA at blastula stage 8, alone or in combination with 2 ng recombinant BMP4 protein. SU5402 treatment (180  $\mu$ M) was initiated at the 4-cell stage. Embryos were harvested at the indicated stages and analyzed by WISH. The initiation of *zic1* depends on BMP inhibition, whereas the initiation of *zic3* depends on FGF signaling. Both genes are eventually down-regulated by either treatment at the onset of gastrulation (stage 10). All embryos are viewed dorsally, animal to the top. (B) Animal caps were prepared from stage 8 embryos and cultured in the presence or not of CHX (10  $\mu$ g/mL) for a period of 2.5 h at 18  $^{\circ}$ C, when they were harvested. (Left) Quantitative RT-PCR analysis showing the normalized expression of *zic1*, *zic3*, and *foxD5a* in CHX caps (ODC was used as an internal control), relative to untreated control caps. (Right) WISH staining. Note that CHX activates all 3 genes. (C) Sixteen-cell embryos were injected in one AB4 blastomere with 2.5 ng FLDx alone or with 0.16 pg *FGF4*, and 250 pg *LM-Smad1* mRNAs, as indicated. WISH was performed on embryos fixed at stage 8.5. Embryos were hemisected following staining to improve imaging. (Bottom) Orange FLDx staining was cleared to better reveal the blue WISH staining. Both *foxD5a* and *zic3* were activated by *FGF4*, irrespective of the presence of *LM-Smad1*.

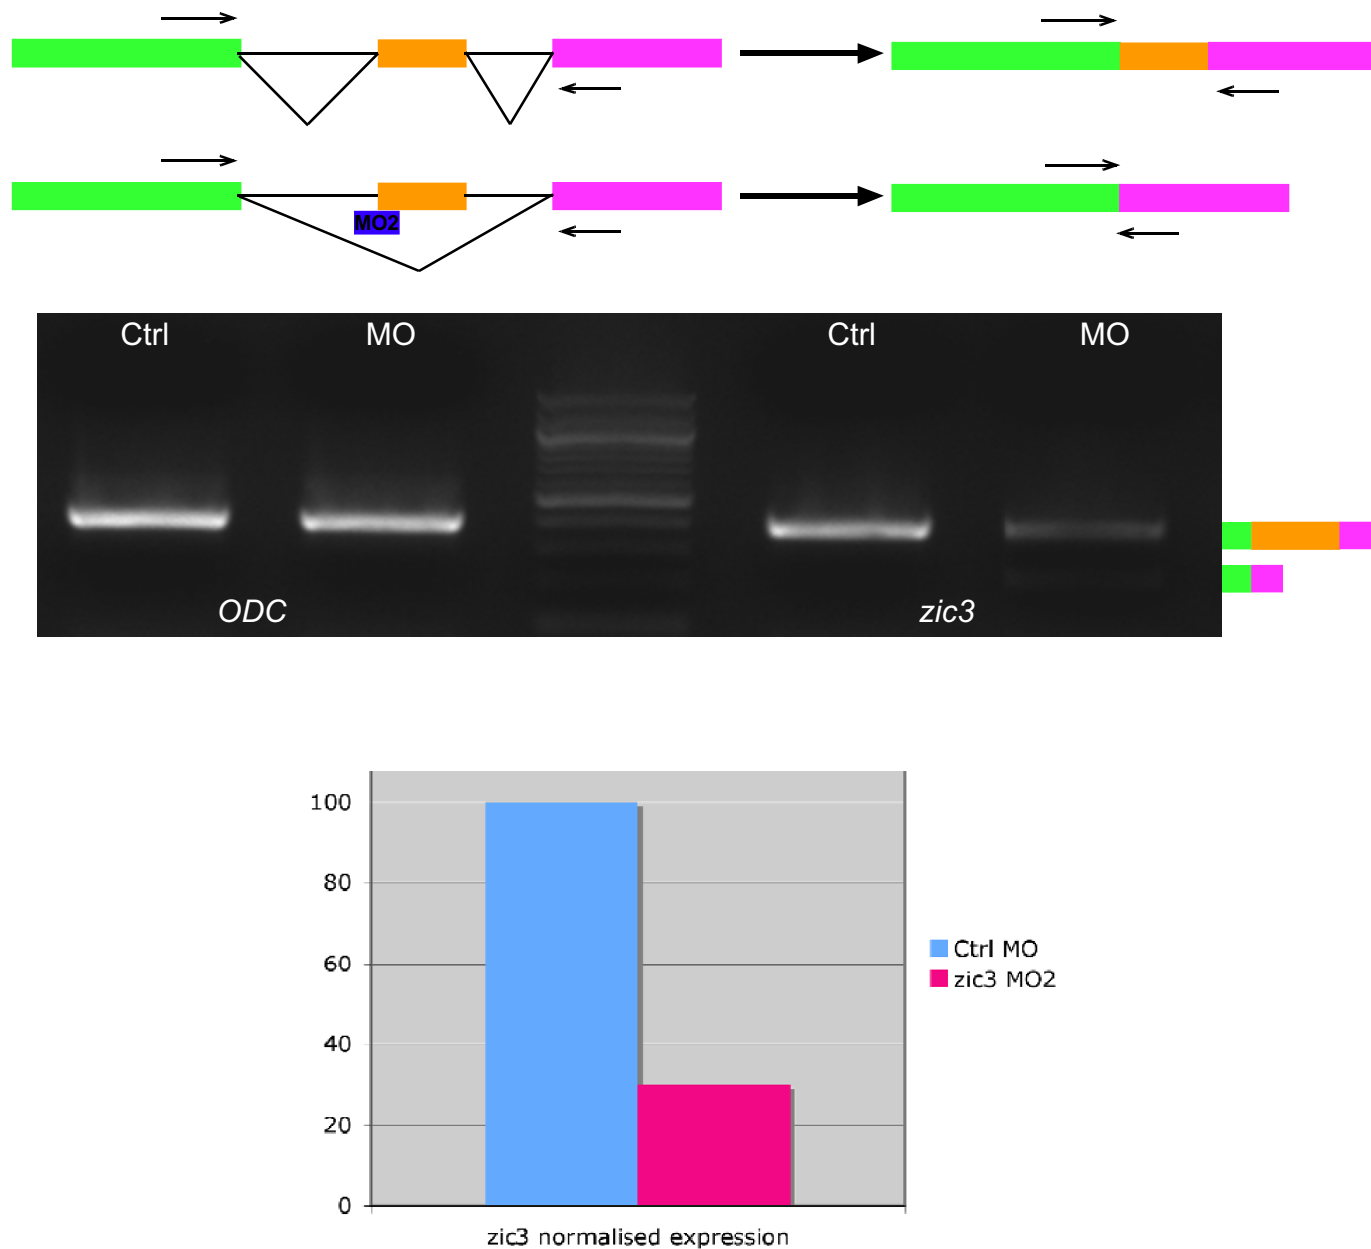

**Fig. S5.** Zic3 MO2 provokes exon 2 skipping. *Top:* Structure of the *zic3* pre mRNA (*Left*) and the mature mRNA following normal splicing (*Right*). The presence of Zic3 MO2 is predicted to provoke skipping of exon 2, yielding a shorter mRNA. The primers used to detect exon 2 are represented by arrows. (*Middle*) Ethidium bromide-stained gel of PCR products amplified from cDNAs prepared from total RNA extracted from stage 10 embryos injected in all cells at 4-cell stage with 23 ng/blastomere control MO or Zic3 MO2. ODC served as an internal control. (*Bottom*) Graph showing the amount of properly spliced *zic3* relative to the amount of ODC in control or Zic3 MO2 conditions. We used ImageJ software to quantify the intensity of the relevant bands on the gel shown above.

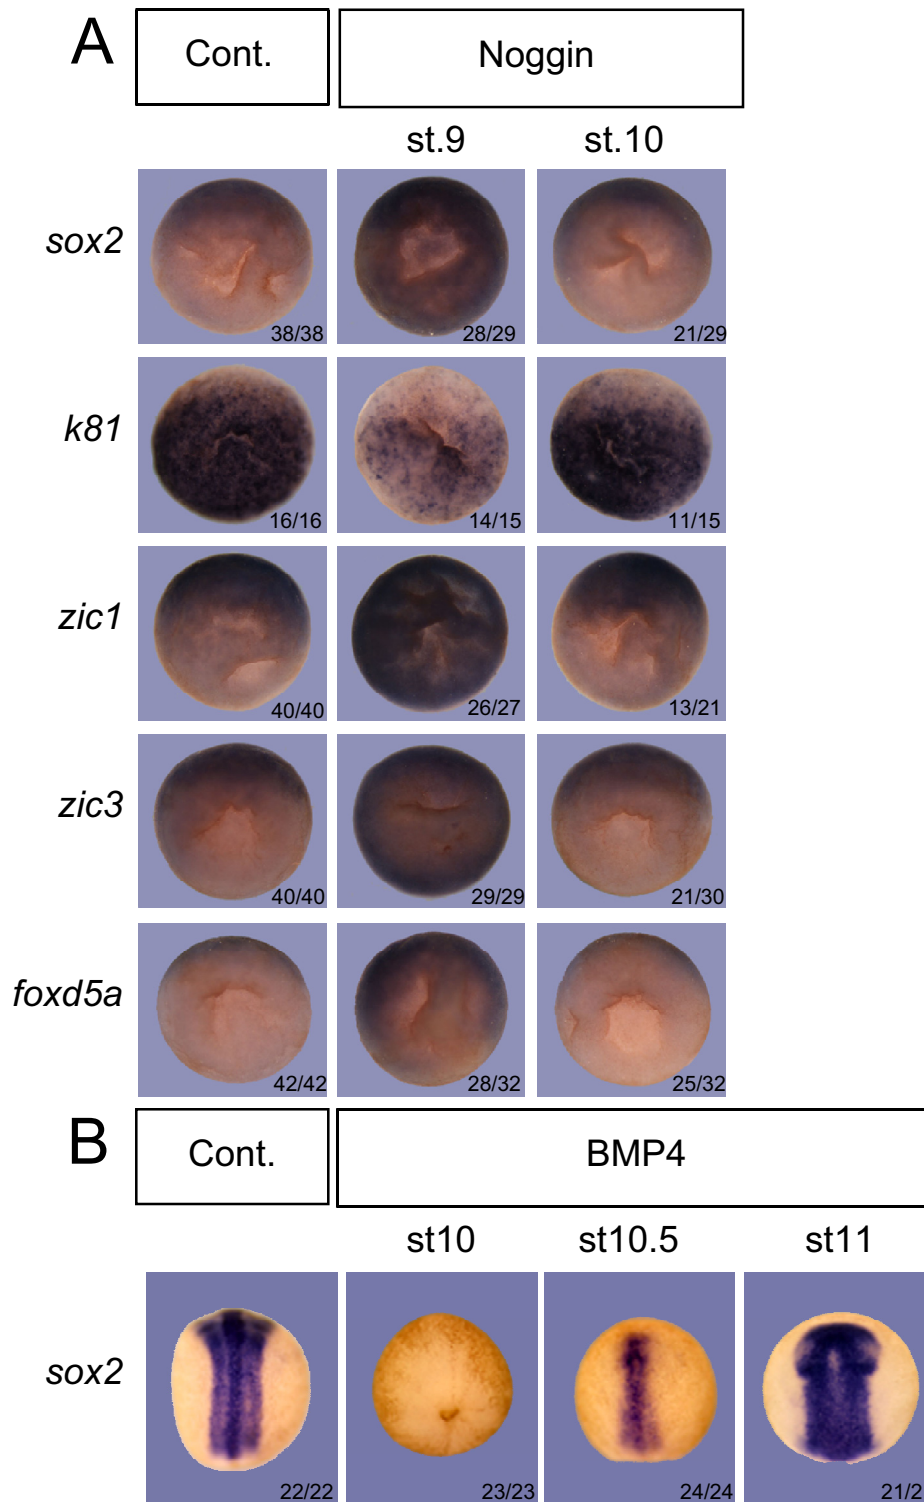

**Fig. S6.** A reversible neural state promoted by BMP inhibition before gastrulation. (A) Embryos were injected with 36 ng recombinant human Noggin protein at blastula stage 9 or at the onset of gastrulation (stage 10) as indicated, and analyzed at stage 10.5. Animal cells show reduced capacity to respond to Noggin after stage 9. All embryos are viewed animally, dorsal to the top. (B) Embryos received a blastocelic injection of 2 ng recombinant human BMP4 protein at the indicated developmental stages, and allowed to develop until early neurula stage. *sox2* expression is repressed by BMP4 exposure at the early gastrula stages 10 and 10.5. This effect is over by mid-gastrula stage 11, suggesting that neural cells are irreversibly engaged. In all panels, the number of embryos with normal *sox2* expression is indicated. All embryos are viewed dorsally, anterior to the top.

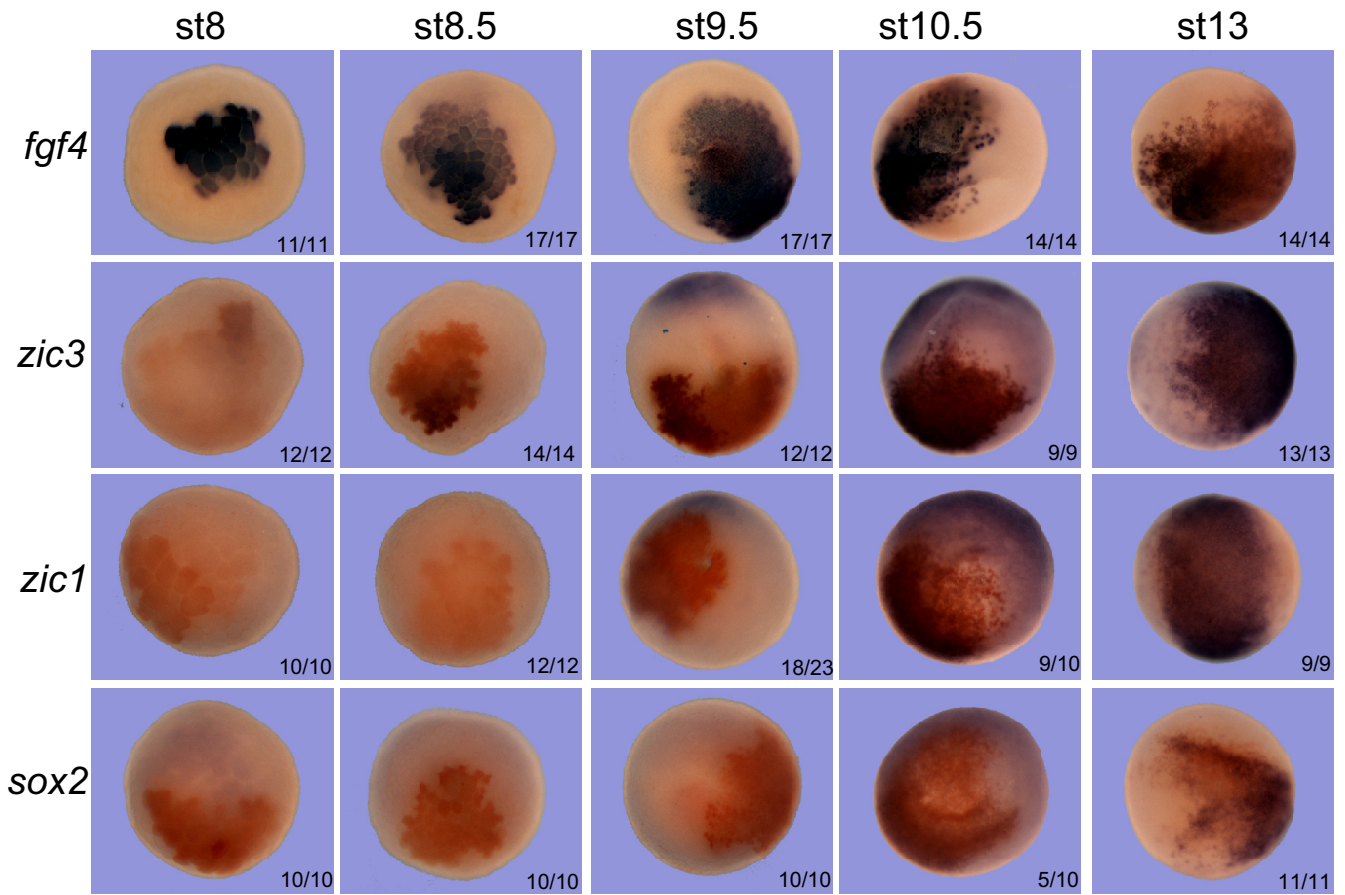

**Fig. S7.** Sequential activation of *FGF4*, *zic3*, *zic1*, and *sox2* in response to *Smad5-sbn*. Sixteen-cell embryos were injected in one AB4 blastomere with 2.5 ng FLDx and 3 ng *smad5-sbn* mRNA and fixed at various stages as indicated. All views are animal, except at stage 13, at which embryos are viewed ventrally. *FGF4* is the first gene activated by *Smad5-sbn*, as early as stage 8 (i.e., MBT), followed by *zic3* and *zic1*, whereas *sox2* is activated last, after the onset of gastrulation.
